# Supplementary material for: Cross-Sectional Study on the Prevalence and Factors Influencing Occurrence of Tick-Borne Encephalitis in Horses in Lithuania
Source: PubMed Central journal article supplement (PMC7911650; doi:10.3390/pathogens10020140), 2021-01-31
Supplement: pathogens-10-00140-s001.pdf [file pathogens-10-00140-s001.pdf]

## Supplementary material

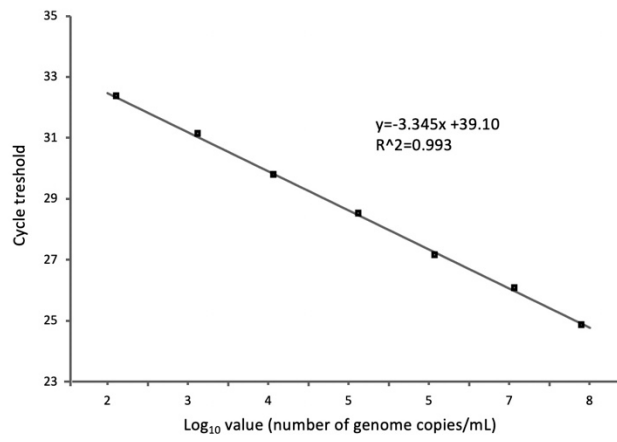

Figure S1. Standard curve of qPCR using serial dilutions of stock DNA.
